# Supplementary material for: Cliona varians-Derived Actinomycetes as Bioresources of Photoprotection-Related Bioactive End-Products
Source: MDPI journal article supplement (doi:10.3390/md19120674), 2021-11-27
Supplement: s1 [file s1]

## Supplementary Materials

### *Cliona varians*-derived actinomycetes as bioresources of photoprotective-related bioactive end-products

Jeysson Sánchez-Suárez <sup>1,2</sup>, Luisa Villamil <sup>2</sup>, Ericsson Coy-Barrera <sup>3</sup> and Luis Díaz <sup>1,2,\*</sup>

<sup>1</sup> Doctorate in Biosciences, School of Engineering, Universidad de La Sabana, 250001 Chía, Cundinamarca, Colombia

<sup>2</sup> Bioprospecting Research Group, School of Engineering, Universidad de La Sabana, 250001 Chía, Cundinamarca, Colombia

<sup>3</sup> Bioorganic Chemistry Laboratory, Universidad Militar Nueva Granada, Cajicá 250247, Colombia

\* Correspondence: luis.diaz1@unisabana.edu.co

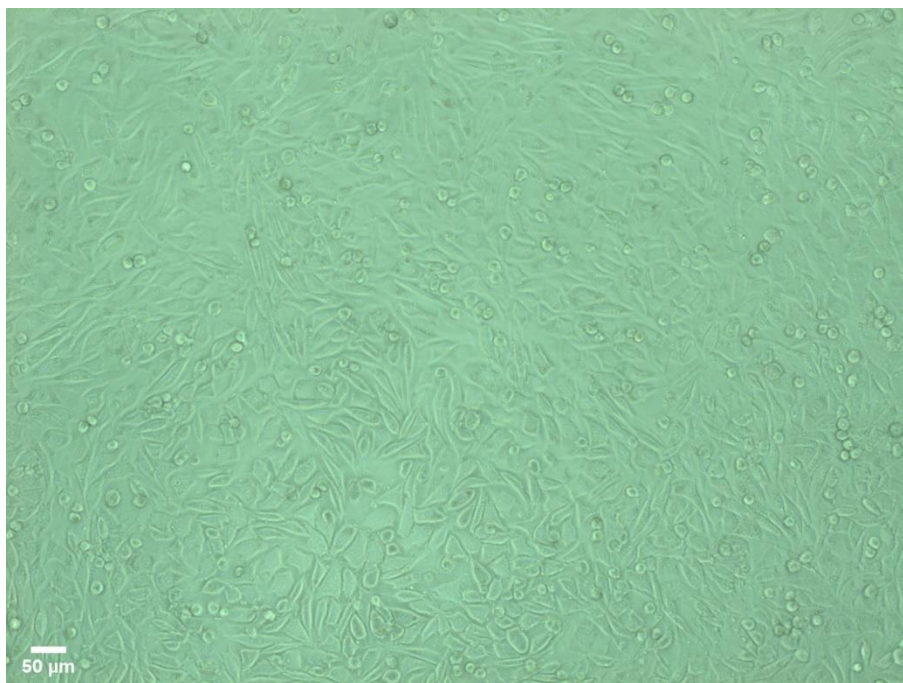

**Figure S1.** Micrograph of HDfA cells exposed to G1225 (500 µg/mL) during 24 h.

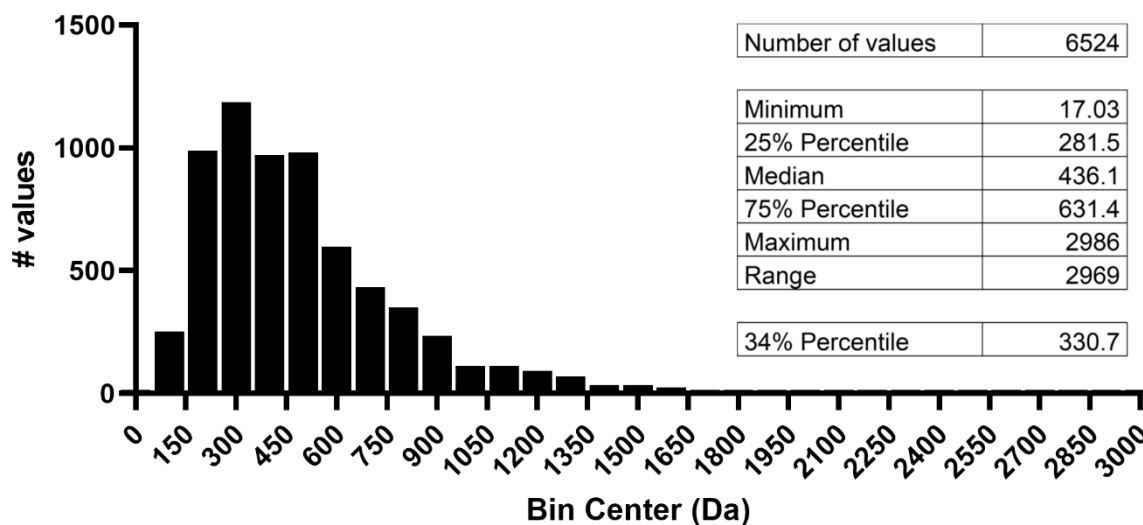

**Figure S2.** Distribution of Streptomyces-derived metabolite masses.

**Table S1.** Identified actinomycetes strains.

| No. | End-products code | Strain name                                |
|-----|-------------------|--------------------------------------------|
| 1   | G1225             | <i>Streptomyces</i> sp. CLIVUS-G1225       |
| 2   | G1228             | <i>Streptomyces</i> sp. CLIVUS-G1228       |
| 3   | G6211             | <i>Streptomyces</i> sp. CLIVUS-G6211       |
| 4   | G6210             | <i>Streptomyces</i> sp. CLIVUS-G6210       |
| 5   | G11126            | <i>Streptomyces</i> sp. CLIVUS-G11126      |
| 6   | G1115             | <i>Gordonia</i> sp. CLIVUS-G1115           |
| 7   | G11122            | <i>Streptomyces</i> sp. CLIVUS-G11122      |
| 8   | G12218            | <i>Promicromonospora</i> sp. CLIVUS-G12218 |
| 9   | G11117            | <i>Micrococcus</i> sp. CLIVUS-G11117       |
| 10  | G11128            | <i>Micrococcus</i> sp. CLIVUS-G11128       |

**Table S2.** Triangle area of the radar chart shown in the Figure 8.

| Actinomycete strain                        | Triangle area |
|--------------------------------------------|---------------|
| <i>Streptomyces</i> sp. CLIVUS-G1225       | 5542.19       |
| <i>Streptomyces</i> sp. CLIVUS-G1228       | 4162.70       |
| <i>Streptomyces</i> sp. CLIVUS-G6211       | 4112.90       |
| <i>Streptomyces</i> sp. CLIVUS-G6210       | 4024.27       |
| <i>Streptomyces</i> sp. CLIVUS-G11126      | 3302.97       |
| <i>Gordonia</i> sp. CLIVUS-G1115           | 2280.98       |
| <i>Streptomyces</i> sp. CLIVUS-G11122      | 1420.40       |
| <i>Promicromonospora</i> sp. CLIVUS-G12218 | 1154.17       |
| <i>Micrococcus</i> sp. CLIVUS-G11117       | 959.89        |
| <i>Micrococcus</i> sp. CLIVUS-G11128       | 908.50        |

**Table S3.** Media composition.

| <b>Item</b>       | <b>Glucose Yeast Media (GYM)</b> | <b>Zobell Marine Medium (Zoberll, ¼ strength)</b> |
|-------------------|----------------------------------|---------------------------------------------------|
| D-Glucose         | 4                                | N/A                                               |
| Yeast Extract     | 4                                | 1.25                                              |
| Malt Extract      | 10                               | N/A                                               |
| NaCl              | 24                               | 18                                                |
| MgCl <sub>2</sub> | 5.3                              | 2                                                 |
| KCl               | 0.7                              | 0.525                                             |
| CaCl <sub>2</sub> | 0.1                              | 0.075                                             |
| Agar              | 15                               | 15                                                |
| Peptone           | N/A                              | 3.75                                              |

The values are given in grams (g) per liter of medium.
